# Supplementary material
Source: PubMed Central journal article supplement (PMC1458806)

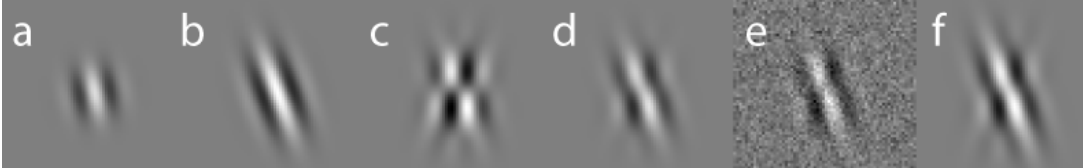

Supplement: pnas_0507259103_1.pdf [file pnas_0507259103_1.pdf]
